# Supplementary figures and images for: Assessing conditions favoring the survival of African dust-borne microorganisms during long-range transport across the tropical Atlantic
Source: Royal Society of Chemistry journal article supplement (doi:10.1039/d4ea00093e), 2024-12-23

### US-CARIB

### AMZN

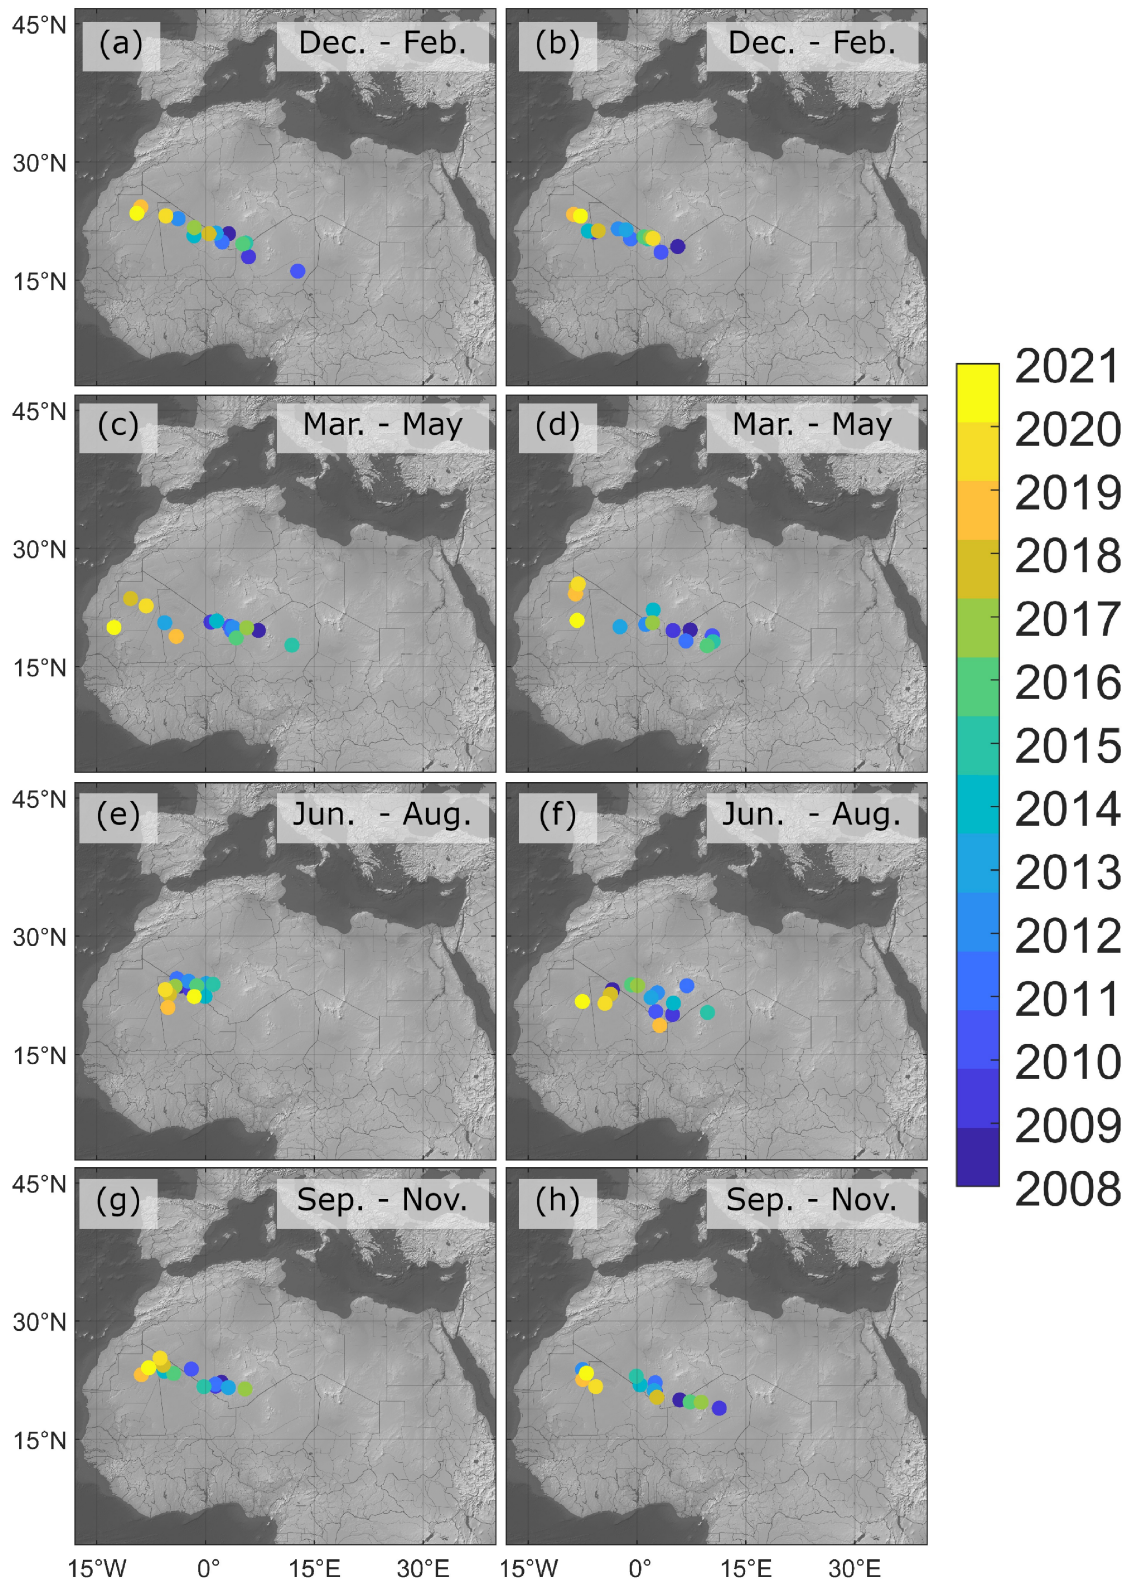

Supplement: d4ea00093e1.pdf [file d4ea00093e1.pdf]
